# Supplementary material for: Flexible aqueous supercapacitors with excellent cycling performance and high-energy density based on mesocrystalline NiCo-LDHs
Source: Royal Society of Chemistry journal article supplement (doi:10.1039/d3cp00450c), 2023-01-01
Supplement: d3cp00450c1.pdf [file d3cp00450c1.pdf]

## Supporting Information

### **Flexible aqueous supercapacitor with excellent cycling performance and high energy density based on mesocrystalline NiCo-LDHs**

Xiaohui Xie <sup>a,1</sup>, Jinyue Song <sup>a</sup>, Hongguang Fan <sup>a</sup>, Lichong Bai <sup>a</sup>, Shuang Liu <sup>a</sup>, Yanpeng Wang <sup>a</sup>, Wansu Zheng <sup>a</sup>, Wei Liu <sup>a,\*</sup>

<sup>a</sup> School of Materials Science and Engineering, Ocean University of China, Qingdao 266100, China

\*Corresponding Authors E-mail: weiliu@ouc.edu.cn (Wei Liu)

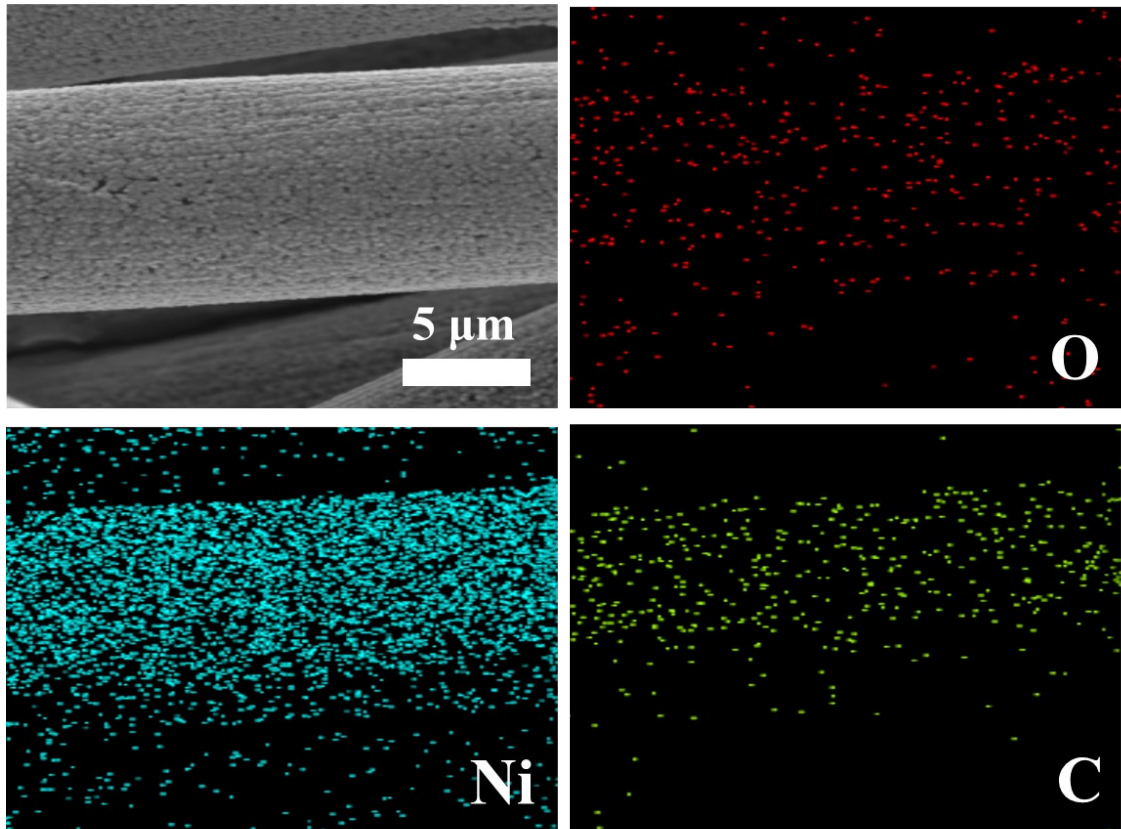

Fig. S1 The EDS images of the NiO-Ni/CC sample.

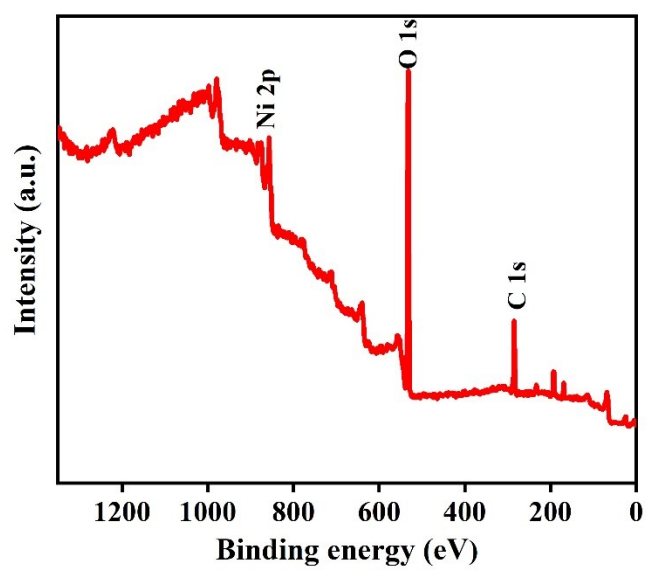

Fig. S2 The full spectrum of NiO-Ni/CC.

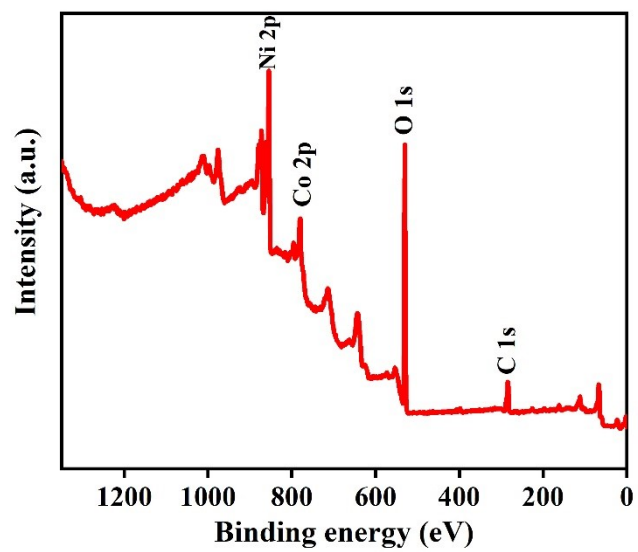

Fig. S3 The full spectrum of NiCo-LDH/NiO-Ni/CC.

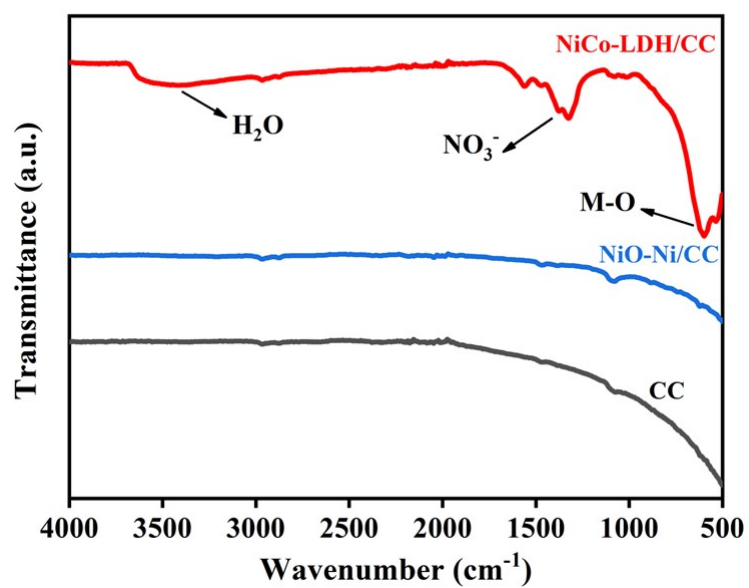

Fig. S4 The FTIR spectra of CC, NiO-Ni/CC and NiCo-LDH/CC samples.

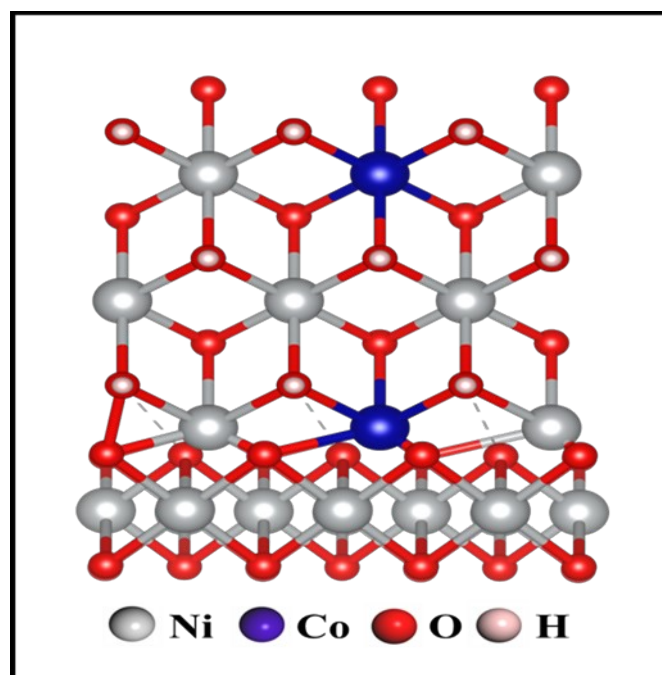

Fig. S5 The structural model of NiCo-LDH/NiO.

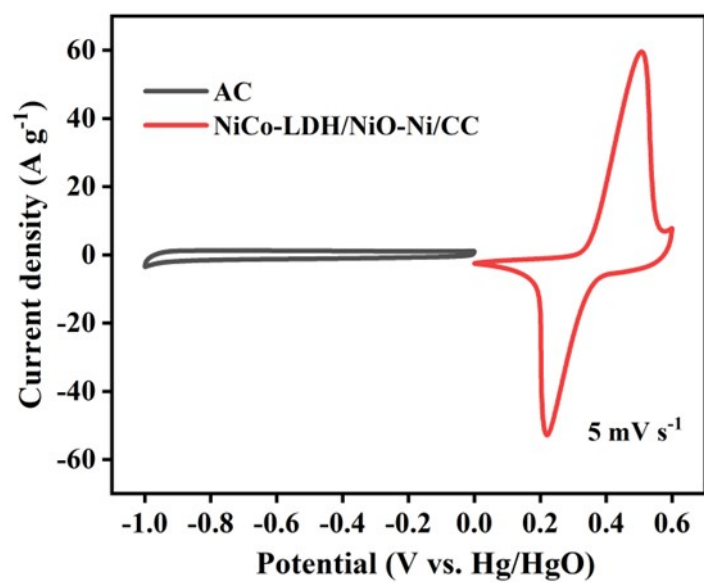

Fig. S6 CV curves of NiCo-LDH/NiO-Ni/CC and AC at 5 mV s<sup>-1</sup>.

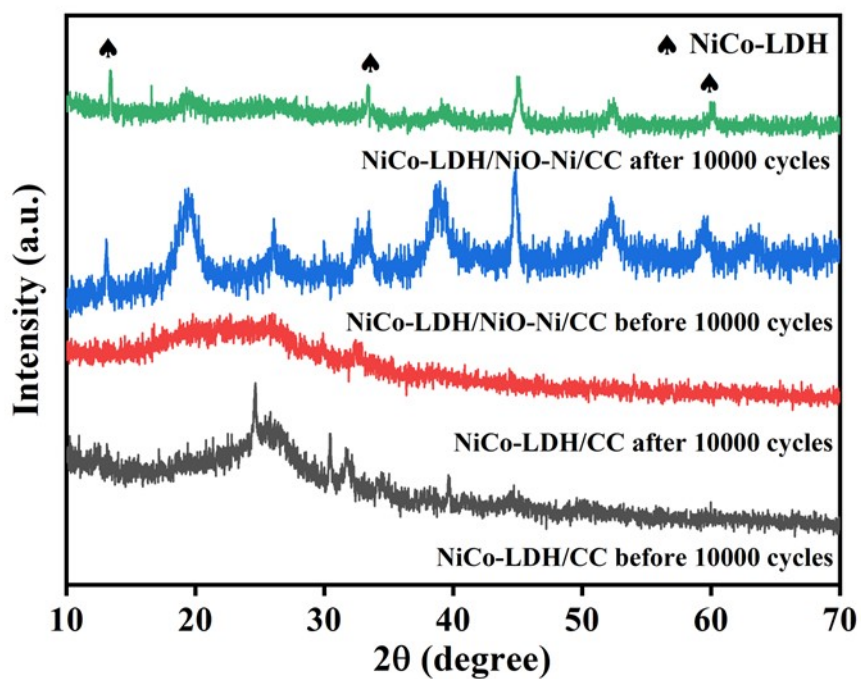

Fig. S7 The XRD of NiCo-LDH/CC and NiCo-LDH/NiO-Ni/CC before and after 10000 cycles.
